# Supplementary material
Source: MDPI journal article supplement (https://www.mdpi.com/2071-1050/14/3/1095)
Supplement: s1 [file s1]

**Table S1. Complete estimates from the final mixed-effects logistic model of compliance with three animal-based checkpoints at official animal welfare inspections on Swedish cattle farms in 2012–2017;  $n=8,700$  inspections; farm identity included as random intercept.**

| Variable                               | Level                                         | Odds ratio | Std. error | $p$                  | 95% conf. interval |
|----------------------------------------|-----------------------------------------------|------------|------------|----------------------|--------------------|
| Intercept                              | -                                             | 3.20       | 0.69       | <0.0001              | 2.10 , 4.87        |
| Pasture area, ha                       | 0–1                                           | 1 (base)   |            | 0.21 <sup>7</sup>    |                    |
|                                        | 1–5                                           | 0.87       | 0.14       | 0.34                 | 0.63 , 1.20        |
|                                        | 5–15                                          | 1.02       | 0.18       | 0.90                 | 0.73 , 1.44        |
|                                        | >15                                           | 1.12       | 0.22       | 0.54                 | 0.77 , 1.64        |
| TUV A land percentage <sup>1</sup> , % | 0                                             | 1 (base)   |            | 0.18 <sup>7</sup>    |                    |
|                                        | 0–3                                           | 0.87       | 0.08       | 0.15                 | 0.72 , 1.05        |
|                                        | 3–12                                          | 0.79       | 0.09       | 0.040                | 0.64 , 0.99        |
|                                        | 12–100                                        | 0.82       | 0.10       | 0.11                 | 0.64 , 1.05        |
| AES level <sup>2</sup>                 | <i>Applied general values only</i>            | 1 (base)   |            | 0.0004 <sup>7</sup>  |                    |
|                                        | <i>Applied special values, all granted</i>    | 1.65       | 0.19       | <0.0001              | 1.31 , 2.07        |
|                                        | <i>Applied special values, partly granted</i> | 1.55       | 0.19       | 0.0004               | 1.22 , 1.97        |
|                                        | <i>Applied special values, not granted</i>    | 1.29       | 0.18       | 0.074                | 0.98 , 1.71        |
|                                        | <i>Applied other values only</i>              | 1.12       | 0.21       | 0.57                 | 0.77 , 1.62        |
|                                        | <i>No semi-natural grassland</i>              | 0.87       | 0.15       | 0.41                 | 0.63 , 1.21        |
| Total agricultural area, ha            | 1–20                                          | 1 (base)   |            | 0.027 <sup>7</sup>   |                    |
|                                        | 20–50                                         | 0.82       | 0.09       | 0.065                | 0.66 , 1.01        |
|                                        | 50–100                                        | 0.71       | 0.08       | 0.0028               | 0.57 , 0.89        |
|                                        | >100                                          | 0.80       | 0.10       | 0.075                | 0.63 , 1.02        |
| Geographical region <sup>3</sup>       | <i>South</i>                                  | 1 (base)   |            | <0.0001 <sup>7</sup> |                    |
|                                        | <i>Middle</i>                                 | 1.52       | 0.14       | <0.0001              | 1.27 , 1.81        |
|                                        | <i>North</i>                                  | 1.26       | 0.12       | 0.018                | 1.04 , 1.52        |
| Inspection type <sup>4</sup>           | <i>Random</i>                                 | 1 (base)   |            | <0.0001 <sup>7</sup> |                    |
|                                        | <i>Risk</i>                                   | 1.00       | 0.13       | 0.98                 | 0.78 , 1.29        |
|                                        | <i>Complaint</i>                              | 0.06       | 0.01       | <0.0001              | 0.04 , 0.08        |
|                                        | <i>Follow-up</i>                              | 0.24       | 0.03       | <0.0001              | 0.19 , 0.32        |
|                                        | <i>Cross-compliance</i>                       | 1.20       | 0.19       | 0.25                 | 0.88 , 1.65        |
|                                        | <i>Other</i>                                  | 1.32       | 0.19       | 0.053                | 1.00 , 1.75        |
| Inspection year                        | 2012                                          | 1 (base)   |            | 0.0017 <sup>7</sup>  |                    |
|                                        | 2013                                          | 1.09       | 0.12       | 0.40                 | 0.89 , 1.35        |
|                                        | 2014                                          | 1.17       | 0.13       | 0.16                 | 0.94 , 1.45        |
|                                        | 2015                                          | 1.37       | 0.15       | 0.0033               | 1.11 , 1.69        |
|                                        | 2016                                          | 1.50       | 0.16       | 0.0002               | 1.21 , 1.86        |
|                                        | 2017                                          | 1.37       | 0.15       | 0.0032               | 1.11 , 1.68        |
| Inspection season <sup>5</sup>         | <i>Spring</i>                                 | 1 (base)   |            | <0.0001 <sup>7</sup> |                    |
|                                        | <i>Summer</i>                                 | 2.13       | 0.26       | <0.0001              | 1.68 , 2.70        |
|                                        | <i>Autumn</i>                                 | 1.90       | 0.17       | <0.0001              | 1.60 , 2.25        |
|                                        | <i>Winter</i>                                 | 0.73       | 0.05       | <0.0001              | 0.64 , 0.84        |
| Both species inspected <sup>6</sup>    | No                                            | 1 (base)   |            | <0.0089 <sup>7</sup> |                    |
|                                        | Yes                                           | 1.35       | 0.16       | 0.0089               | 1.08 , 1.69        |

<sup>1–6</sup> Explanations for these terms are given in the footnotes of Table 1. <sup>7</sup> Joint Wald test of effect.

**Table S2. Complete estimates from the final mixed-effects logistic model of compliance with three animal-based checkpoints at official animal welfare inspections on Swedish cattle farms with TUV A land<sup>1</sup> in 2012–2017;  $n=5,110$  inspections; farm identity included as random intercept.**

| Variable                               | Level                                         | Odds ratio | Std. error | <i>p</i>             | 95% conf. interval |
|----------------------------------------|-----------------------------------------------|------------|------------|----------------------|--------------------|
| Intercept                              | -                                             | 4.07       | 1.62       | 0.0004               | 1.87 , 8.87        |
| Pasture area, ha                       | 0–1                                           | 1 (base)   |            | 0.057 <sup>9</sup>   |                    |
|                                        | 1–5                                           | 0.50       | 0.17       | 0.037                | 0.26 , 0.96        |
|                                        | 5–15                                          | 0.64       | 0.22       | 0.19                 | 0.33 , 1.24        |
|                                        | >15                                           | 0.69       | 0.24       | 0.29                 | 0.35 , 1.37        |
| TUV A land percentage <sup>1</sup> , % | 0–3                                           | 1 (base)   |            | 0.68 <sup>9</sup>    |                    |
|                                        | 3–12                                          | 0.90       | 0.11       | 0.39                 | 0.71 , 1.14        |
|                                        | 12–100                                        | 0.91       | 0.13       | 0.48                 | 0.69 , 1.19        |
| AES level <sup>2</sup>                 | <i>Applied general values only</i>            | 1 (base)   |            | 0.011 <sup>9</sup>   |                    |
|                                        | <i>Applied special values, all granted</i>    | 1.53       | 0.20       | 0.0009               | 1.19 , 1.96        |
|                                        | <i>Applied special values, partly granted</i> | 1.43       | 0.19       | 0.0087               | 1.09 , 1.86        |
|                                        | <i>Applied special values, not granted</i>    | 1.36       | 0.25       | 0.086                | 0.96 , 1.94        |
|                                        | <i>Applied other values only</i>              | 1.21       | 0.28       | 0.41                 | 0.77 , 1.91        |
|                                        | <i>No semi-natural grassland</i>              | 0.59       | 0.21       | 0.14                 | 0.29 , 1.19        |
| Indicator plant species <sup>3</sup>   | 0–4                                           | 1 (base)   |            | 0.95 <sup>9</sup>    |                    |
|                                        | 5–8                                           | 1.03       | 0.12       | 0.80                 | 0.82 , 1.30        |
|                                        | >8                                            | 1.00       | 0.13       | 0.99                 | 0.78 , 1.28        |
| Natura 2000 <sup>4</sup>               | No                                            | 1 (base)   |            | 0.059 <sup>9</sup>   |                    |
|                                        | Yes                                           | 1.36       | 0.22       | 0.059                | 0.99 , 1.88        |
| Total agricultural area, ha            | 1–20                                          | 1 (base)   |            | 0.13 <sup>9</sup>    |                    |
|                                        | 20–50                                         | 0.99       | 0.17       | 0.97                 | 0.71 , 1.39        |
|                                        | 50–100                                        | 0.75       | 0.13       | 0.11                 | 0.53 , 1.06        |
|                                        | >100                                          | 0.81       | 0.15       | 0.27                 | 0.56 , 1.17        |
| Geographical region <sup>5</sup>       | <i>South</i>                                  | 1 (base)   |            | 0.28 <sup>9</sup>    |                    |
|                                        | <i>Middle</i>                                 | 1.20       | 0.14       | 0.11                 | 0.96 , 1.51        |
|                                        | <i>North</i>                                  | 1.04       | 0.14       | 0.75                 | 0.80 , 1.36        |
| Inspection type <sup>6</sup>           | <i>Random</i>                                 | 1 (base)   |            | <0.0001 <sup>9</sup> |                    |
|                                        | <i>Risk</i>                                   | 0.94       | 0.16       | 0.71                 | 0.67 , 1.32        |
|                                        | <i>Complaint</i>                              | 0.05       | 0.01       | <0.0001              | 0.03 , 0.08        |
|                                        | <i>Follow-up</i>                              | 0.20       | 0.04       | <0.0001              | 0.14 , 0.28        |
|                                        | <i>Cross-compliance</i>                       | 1.05       | 0.22       | 0.81                 | 0.69 , 1.60        |
|                                        | <i>Other</i>                                  | 1.12       | 0.21       | 0.54                 | 0.78 , 1.62        |
| Inspection year                        | 2012                                          | 1 (base)   |            | 0.0079 <sup>9</sup>  |                    |
|                                        | 2013                                          | 1.15       | 0.16       | 0.32                 | 0.88 , 1.51        |
|                                        | 2014                                          | 1.07       | 0.15       | 0.65                 | 0.80 , 1.42        |
|                                        | 2015                                          | 1.33       | 0.19       | 0.041                | 1.01 , 1.76        |
|                                        | 2016                                          | 1.62       | 0.23       | 0.0007               | 1.23 , 2.15        |
|                                        | 2017                                          | 1.40       | 0.19       | 0.016                | 1.07 , 1.83        |
| Inspection season <sup>7</sup>         | <i>Spring</i>                                 | 1 (base)   |            | <0.0001 <sup>9</sup> |                    |
|                                        | <i>Summer</i>                                 | 2.21       | 0.37       | <0.0001              | 1.60 , 3.07        |
|                                        | <i>Autumn</i>                                 | 1.85       | 0.21       | <0.0001              | 1.47 , 2.32        |
|                                        | <i>Winter</i>                                 | 0.67       | 0.06       | <0.0001              | 0.56 , 0.81        |
| Both species inspected <sup>8</sup>    | No                                            | 1 (base)   |            | 0.024 <sup>9</sup>   |                    |
|                                        | Yes                                           | 1.39       | 0.20       | 0.024                | 1.04 , 1.85        |

<sup>1–8</sup> Explanations for these terms are given in the footnotes of Table 1. <sup>9</sup> Joint Wald test of effect.

**Table S3. Complete estimates from the final mixed-effects logistic model of compliance with three animal-based checkpoints at official animal welfare inspections on Swedish sheep farms in 2012–2017;  $n=2,823$  inspections; farm identity included as random intercept.**

| Variable                              | Level                                         | Odds ratio | Std. error | $p$                  | 95% conf. interval |
|---------------------------------------|-----------------------------------------------|------------|------------|----------------------|--------------------|
| Intercept                             | -                                             | 7.42       | 2.92       | <0.0001              | 3.43 , 16.05       |
| Pasture area, ha                      | 0–1                                           | 1 (base)   |            | 0.016 <sup>7</sup>   |                    |
|                                       | 1–5                                           | 0.64       | 0.18       | 0.11                 | 0.37 , 1.11        |
|                                       | 5–15                                          | 1.14       | 0.35       | 0.68                 | 0.62 , 2.08        |
|                                       | >15                                           | 1.01       | 0.38       | 0.97                 | 0.49 , 2.10        |
| TUVÅ land percentage <sup>1</sup> , % | 0                                             | 1 (base)   |            | 0.89 <sup>7</sup>    |                    |
|                                       | 0–3                                           | 1.15       | 0.24       | 0.50                 | 0.77 , 1.72        |
|                                       | 3–12                                          | 0.99       | 0.22       | 0.97                 | 0.64 , 1.52        |
|                                       | 12–100                                        | 0.96       | 0.19       | 0.84                 | 0.65 , 1.43        |
| AES level <sup>2</sup>                | <i>Applied general values only</i>            | 1 (base)   |            | 0.29 <sup>7</sup>    |                    |
|                                       | <i>Applied special values, all granted</i>    | 1.29       | 0.28       | 0.23                 | 0.85 , 1.96        |
|                                       | <i>Applied special values, partly granted</i> | 1.09       | 0.27       | 0.74                 | 0.66 , 1.78        |
|                                       | <i>Applied special values, not granted</i>    | 0.94       | 0.24       | 0.80                 | 0.56 , 1.56        |
|                                       | <i>Applied other values only</i>              | 0.78       | 0.28       | 0.49                 | 0.39 , 1.57        |
|                                       | <i>No semi-natural grassland</i>              | 0.58       | 0.17       | 0.060                | 0.33 , 1.02        |
| Total agricultural area, ha           | 1–20                                          | 1 (base)   |            | 0.0006 <sup>7</sup>  |                    |
|                                       | 20–50                                         | 0.55       | 0.09       | 0.0005               | 0.40 , 0.77        |
|                                       | 50–100                                        | 0.40       | 0.10       | 0.0003               | 0.25 , 0.66        |
|                                       | >100                                          | 0.42       | 0.15       | 0.014                | 0.21 , 0.84        |
| Cereals and oilseeds area, ha         | 0                                             | 1 (base)   |            | 0.023 <sup>7</sup>   |                    |
|                                       | 0–7                                           | 1.19       | 0.21       | 0.31                 | 0.85 , 1.67        |
|                                       | 7–27                                          | 1.61       | 0.37       | 0.039                | 1.02 , 2.53        |
|                                       | >27                                           | 2.77       | 1.00       | 0.0050               | 1.36 , 5.64        |
| Geographical region <sup>3</sup>      | <i>South</i>                                  | 1 (base)   |            | 0.0041 <sup>7</sup>  |                    |
|                                       | <i>Middle</i>                                 | 1.78       | 0.31       | 0.0009               | 1.27 , 2.51        |
|                                       | <i>North</i>                                  | 1.43       | 0.29       | 0.071                | 0.97 , 2.12        |
| Landscape type <sup>4</sup>           | <i>Arable-dominated</i>                       | 1 (base)   |            | 0.036 <sup>7</sup>   |                    |
|                                       | <i>Mosaic</i>                                 | 1.46       | 0.27       | 0.039                | 1.02 , 2.08        |
|                                       | <i>Forest-dominated</i>                       | 1.02       | 0.18       | 0.93                 | 0.71 , 1.45        |
|                                       | <i>No agricultural land</i>                   | 0.42       | 0.21       | 0.081                | 0.16 , 1.11        |
| Inspection type <sup>5</sup>          | <i>Random</i>                                 | 1 (base)   |            | <0.0001 <sup>7</sup> |                    |
|                                       | <i>Risk</i>                                   | 0.84       | 0.21       | 0.48                 | 0.51 , 1.38        |
|                                       | <i>Complaint</i>                              | 0.03       | 0.01       | <0.0001              | 0.02 , 0.06        |
|                                       | <i>Follow-up</i>                              | 0.12       | 0.03       | <0.0001              | 0.07 , 0.21        |
|                                       | <i>Cross-compliance</i>                       | 1.12       | 0.36       | 0.72                 | 0.60 , 2.11        |
|                                       | <i>Other</i>                                  | 0.93       | 0.26       | 0.79                 | 0.53 , 1.62        |
| Inspection year                       | 2012                                          | 1 (base)   |            | 0.032 <sup>7</sup>   |                    |
|                                       | 2013                                          | 0.99       | 0.22       | 0.95                 | 0.64 , 1.52        |
|                                       | 2014                                          | 0.96       | 0.21       | 0.85                 | 0.62 , 1.47        |
|                                       | 2015                                          | 1.72       | 0.39       | 0.017                | 1.10 , 2.68        |
|                                       | 2016                                          | 1.47       | 0.34       | 0.094                | 0.94 , 2.31        |
|                                       | 2017                                          | 1.28       | 0.28       | 0.26                 | 0.83 , 1.98        |
| Inspection season <sup>6</sup>        | <i>Spring</i>                                 | 1 (base)   |            | 0.0015 <sup>7</sup>  |                    |
|                                       | <i>Summer</i>                                 | 1.73       | 0.38       | 0.013                | 1.12 , 2.67        |
|                                       | <i>Autumn</i>                                 | 1.79       | 0.30       | 0.0005               | 1.29 , 2.48        |
|                                       | <i>Winter</i>                                 | 1.44       | 0.21       | 0.013                | 1.08 , 1.93        |

<sup>1–6</sup> Explanations for these terms are given in the footnotes of Table 1. <sup>7</sup> Joint Wald test of effect.

**Table S4. Complete estimates from the final mixed-effects logistic model of compliance with three animal-based checkpoints at official animal welfare inspections on Swedish sheep farms with TUVA land<sup>1</sup> in 2012–2017;  $n=1,404$  inspections; farm identity included as random intercept.**

| Variable                              | Level                                         | Odds ratio | Std. error | <i>p</i>             | 95% conf. interval |
|---------------------------------------|-----------------------------------------------|------------|------------|----------------------|--------------------|
| Intercept                             | -                                             | 11.07      | 8.31       | 0.0014               | 2.54 , 48.17       |
| Pasture area, ha                      | 0–1                                           | 1 (base)   |            | 0.084 <sup>8</sup>   |                    |
|                                       | 1–5                                           | 0.62       | 0.37       | 0.42                 | 0.19 , 2.01        |
|                                       | 5–15                                          | 1.16       | 0.73       | 0.81                 | 0.34 , 3.96        |
|                                       | >15                                           | 1.27       | 0.87       | 0.73                 | 0.33 , 4.86        |
| TUVA land percentage <sup>1</sup> , % | 0–3                                           | 1 (base)   |            | 0.66 <sup>8</sup>    |                    |
|                                       | 3–12                                          | 0.78       | 0.23       | 0.39                 | 0.44 , 1.38        |
|                                       | 12–100                                        | 0.79       | 0.24       | 0.43                 | 0.44 , 1.42        |
| AES level <sup>2</sup>                | <i>Applied general values only</i>            | 1 (base)   |            | 0.42 <sup>8</sup>    |                    |
|                                       | <i>Applied special values, all granted</i>    | 1.03       | 0.27       | 0.90                 | 0.62 , 1.72        |
|                                       | <i>Applied special values, partly granted</i> | 0.93       | 0.30       | 0.83                 | 0.50 , 1.74        |
|                                       | <i>Applied special values, not granted</i>    | 1.29       | 0.54       | 0.54                 | 0.57 , 2.95        |
|                                       | <i>Applied other values only</i>              | 0.45       | 0.21       | 0.090                | 0.18 , 1.13        |
|                                       | <i>No semi-natural grassland</i>              | 0.48       | 0.32       | 0.27                 | 0.13 , 1.78        |
| Indicator plant species <sup>3</sup>  | 0–4                                           | 1 (base)   |            | 0.14 <sup>8</sup>    |                    |
|                                       | 5–8                                           | 0.98       | 0.26       | 0.95                 | 0.59 , 1.64        |
|                                       | >8                                            | 0.63       | 0.18       | 0.10                 | 0.36 , 1.10        |
| Natura 2000 <sup>4</sup>              | No                                            | 1 (base)   |            | 0.30 <sup>8</sup>    |                    |
|                                       | Yes                                           | 1.44       | 0.51       | 0.30                 | 0.72 , 2.89        |
| Total agricultural area, ha           | 1–20                                          | 1 (base)   |            | 0.13 <sup>8</sup>    |                    |
|                                       | 20–50                                         | 0.66       | 0.17       | 0.10                 | 0.39 , 1.09        |
|                                       | 50–100                                        | 0.50       | 0.16       | 0.034                | 0.26 , 0.95        |
|                                       | >100                                          | 0.80       | 0.31       | 0.57                 | 0.37 , 1.72        |
| Geographical region <sup>5</sup>      | <i>South</i>                                  | 1 (base)   |            | 0.37 <sup>8</sup>    |                    |
|                                       | <i>Middle</i>                                 | 1.40       | 0.34       | 0.16                 | 0.88 , 2.24        |
|                                       | <i>North</i>                                  | 1.17       | 0.32       | 0.58                 | 0.68 , 2.01        |
| Inspection type <sup>6</sup>          | <i>Random</i>                                 | 1 (base)   |            | <0.0001 <sup>8</sup> |                    |
|                                       | <i>Risk</i>                                   | 0.72       | 0.28       | 0.39                 | 0.34 , 1.54        |
|                                       | <i>Complaint</i>                              | 0.02       | 0.01       | <0.0001              | 0.01 , 0.05        |
|                                       | <i>Follow-up</i>                              | 0.07       | 0.03       | <0.0001              | 0.03 , 0.17        |
|                                       | <i>Cross-compliance</i>                       | 0.86       | 0.41       | 0.76                 | 0.34 , 2.18        |
|                                       | <i>Other</i>                                  | 0.98       | 0.42       | 0.96                 | 0.42 , 2.29        |
| Inspection year                       | 2012                                          | 1 (base)   |            | 0.59 <sup>8</sup>    |                    |
|                                       | 2013                                          | 1.25       | 0.42       | 0.52                 | 0.64 , 2.43        |
|                                       | 2014                                          | 1.23       | 0.42       | 0.55                 | 0.63 , 2.40        |
|                                       | 2015                                          | 1.67       | 0.58       | 0.14                 | 0.84 , 3.30        |
|                                       | 2016                                          | 1.79       | 0.63       | 0.098                | 0.90 , 3.56        |
|                                       | 2017                                          | 1.34       | 0.45       | 0.38                 | 0.70 , 2.57        |
| Inspection season <sup>7</sup>        | <i>Spring</i>                                 | 1 (base)   |            | 0.0041 <sup>8</sup>  |                    |
|                                       | <i>Summer</i>                                 | 2.01       | 0.66       | 0.034                | 1.06 , 3.84        |
|                                       | <i>Autumn</i>                                 | 2.57       | 0.71       | 0.0006               | 1.50 , 4.40        |
|                                       | <i>Winter</i>                                 | 1.36       | 0.30       | 0.16                 | 0.88 , 2.10        |

<sup>1–7</sup> Explanations for these terms are given in the footnotes of Table 1. <sup>8</sup> Joint Wald test of effect.
